# Supplementary material for: A 3D binder-free rGO/NiMnCo nanosheet for highly efficient hybrid supercapacitors and ion-selective capacitive deionization
Source: Royal Society of Chemistry journal article supplement (doi:10.1039/d3ta05788g), 2024-01-01
Supplement: d3ta05788g1.pdf [file d3ta05788g1.pdf]

## Supplementary Information

# A 3D Binder-free rGO/NiMnCo Nanosheet: Towards High Efficient Hybrid Supercapacitors and Ion-Selective Capacitive Deionization

Ehsan Delfani<sup>a</sup>, Sajjad Habibzadeh<sup>a</sup>, Morvarid Pourdayan<sup>a</sup>, Leila Naji<sup>b</sup> and Mohammad Reza Ganjali<sup>c</sup>

<sup>a</sup> *Surface reaction and advanced energy materials laboratory, Department of Chemical Engineering, Amirkabir University of Technology (Tehran Polytechnic), PO Box 15875-4413, Tehran, Iran*

<sup>b</sup> *Department of Chemistry, Amirkabir University of Technology (Tehran Polytechnic), PO Box 15875-4413, Tehran, Iran*

<sup>c</sup> *Center of Excellence in Electrochemistry, School of Chemistry, College of Science, University of Tehran, PO Box 11155-4563, Tehran, Iran*

\*[sajjad.habibzadeh@mail.mcgill.ca](mailto:sajjad.habibzadeh@mail.mcgill.ca)

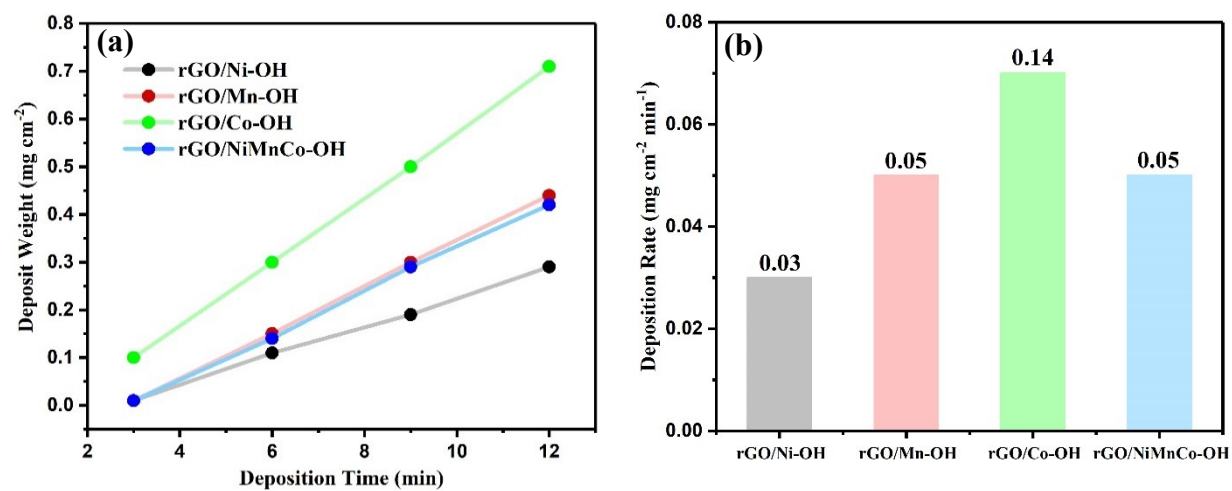

**Fig. S1** (a) Deposit weight and (b) deposition rate of the electrodes

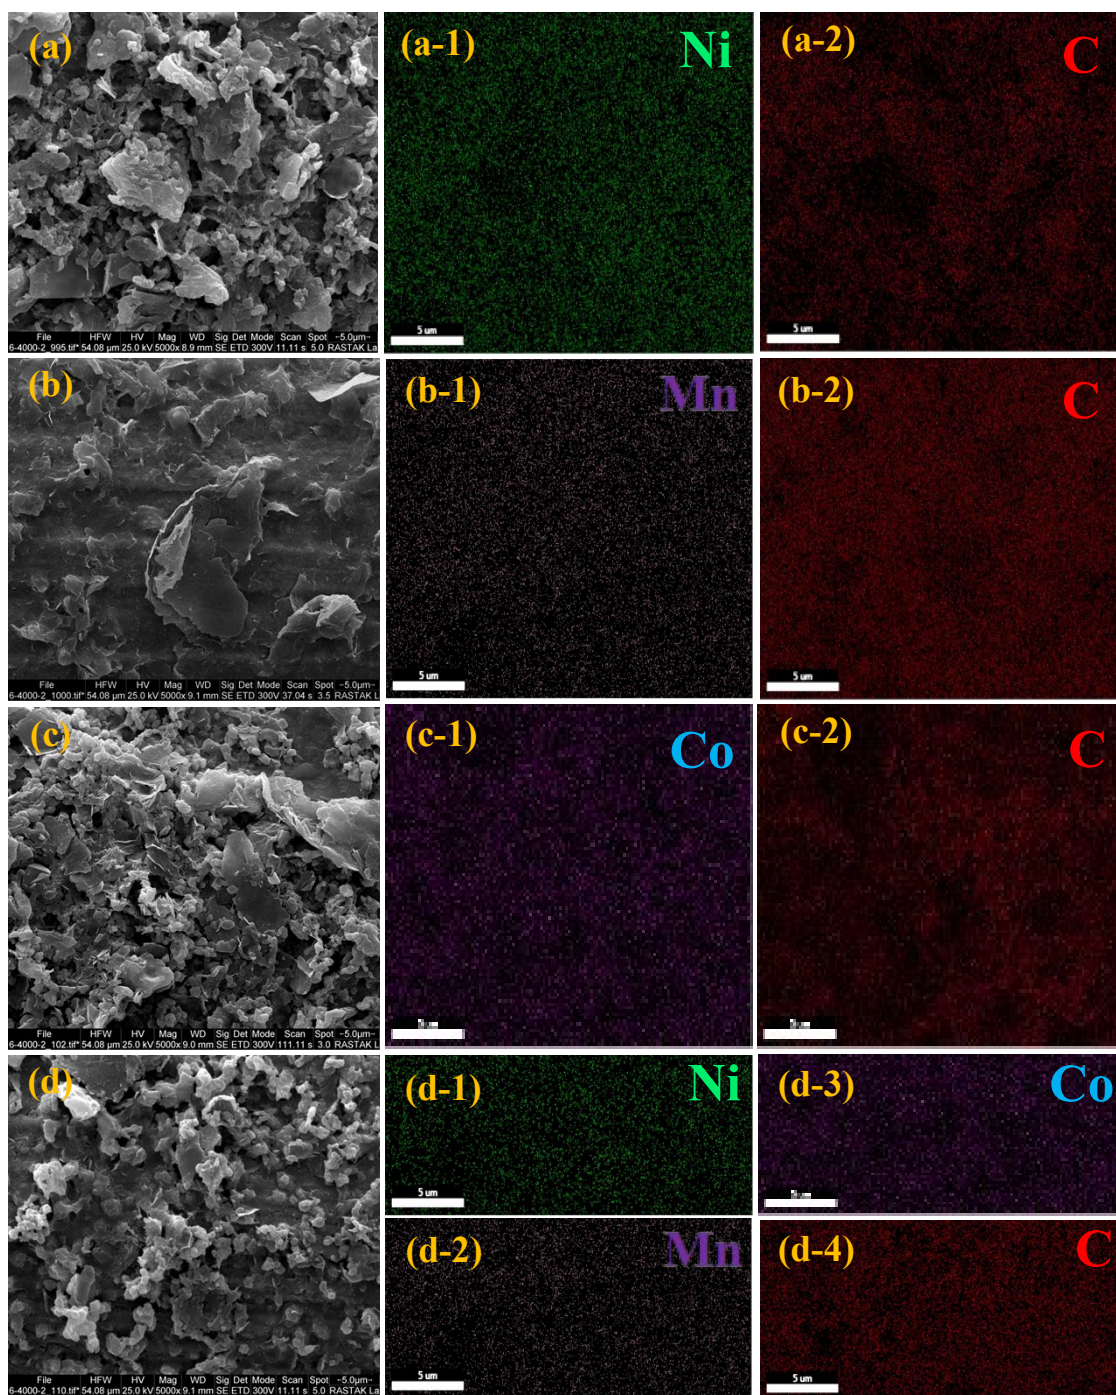

**Fig. S2** FE-SEM and EDS elemental mapping images of (a) rGO/Ni-OH nanosheet, (b) rGO/Mn-OH nanosheet, (c) rGO/Co-OH nanosheet, and (d) rGO/NiMnCo-OH nanosheet.

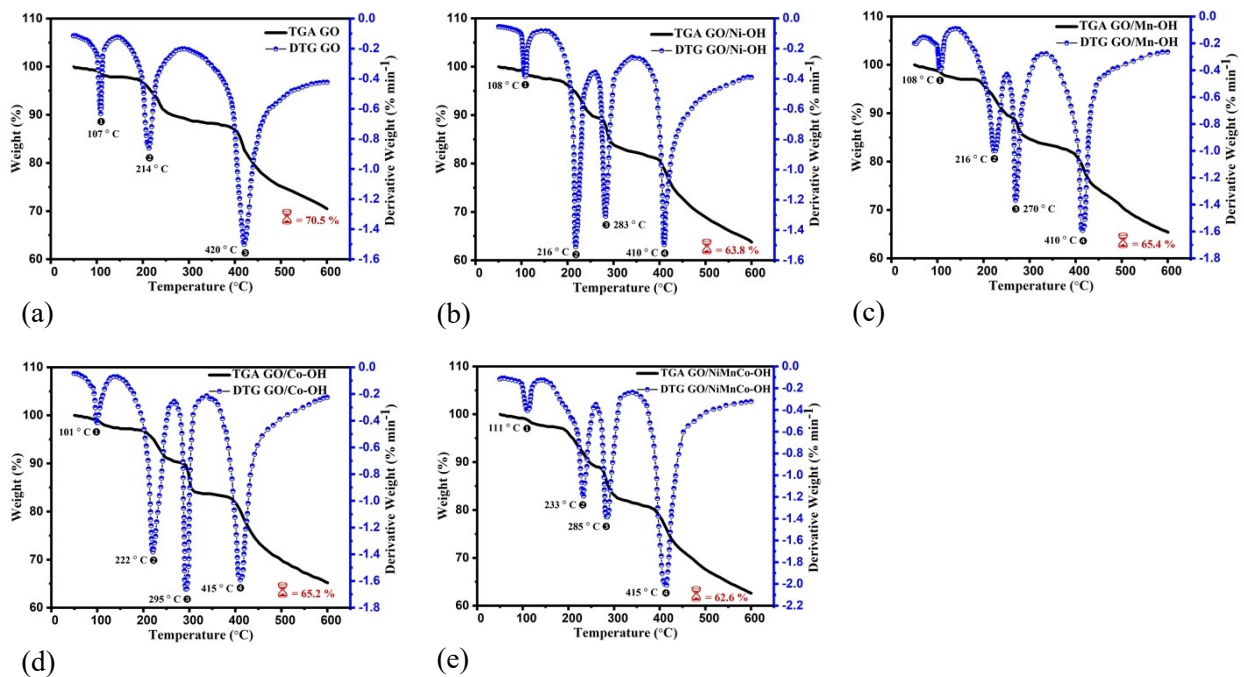

**Fig. S3.** TGA and DTG curves of (a) rGO, (b) rGO/Ni-OH nanosheet, (c) rGO/Mn-OH nanosheet, (d) rGO/Co-OH nanosheet, and (e) rGO/NiMnCo-OH nanosheet.

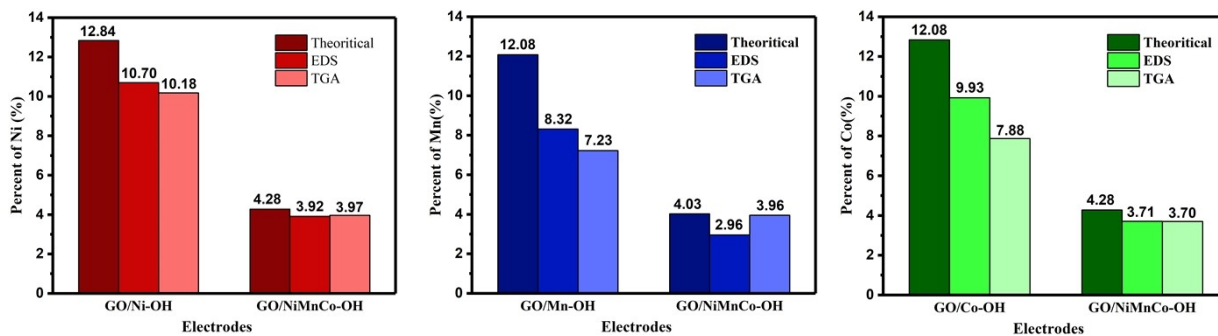

**Fig. S4.** The calculated weight percentages of (a) Ni, (b) Mn, and (c) Co elements in different synthesized nanosheet materials using theoretical, EDS, and TGA methods.

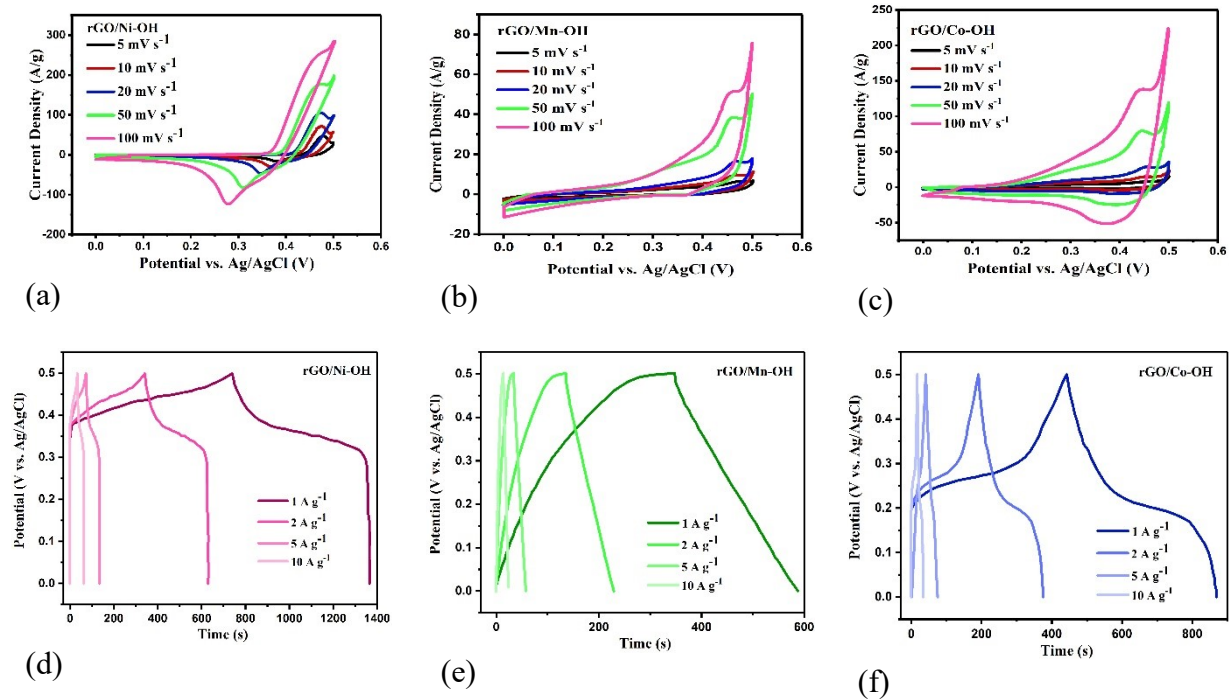

**Fig. S5.** CV curves of (a) rGO/Ni-OH, (b) rGO/Mn-OH, and (c) rGO/Co-OH nanosheet electrodes at different scan rates. GCD curves of (a) rGO/Ni-OH, (b) rGO/Mn-OH, and (c) rGO/Co-OH nanosheet electrodes at current densities.

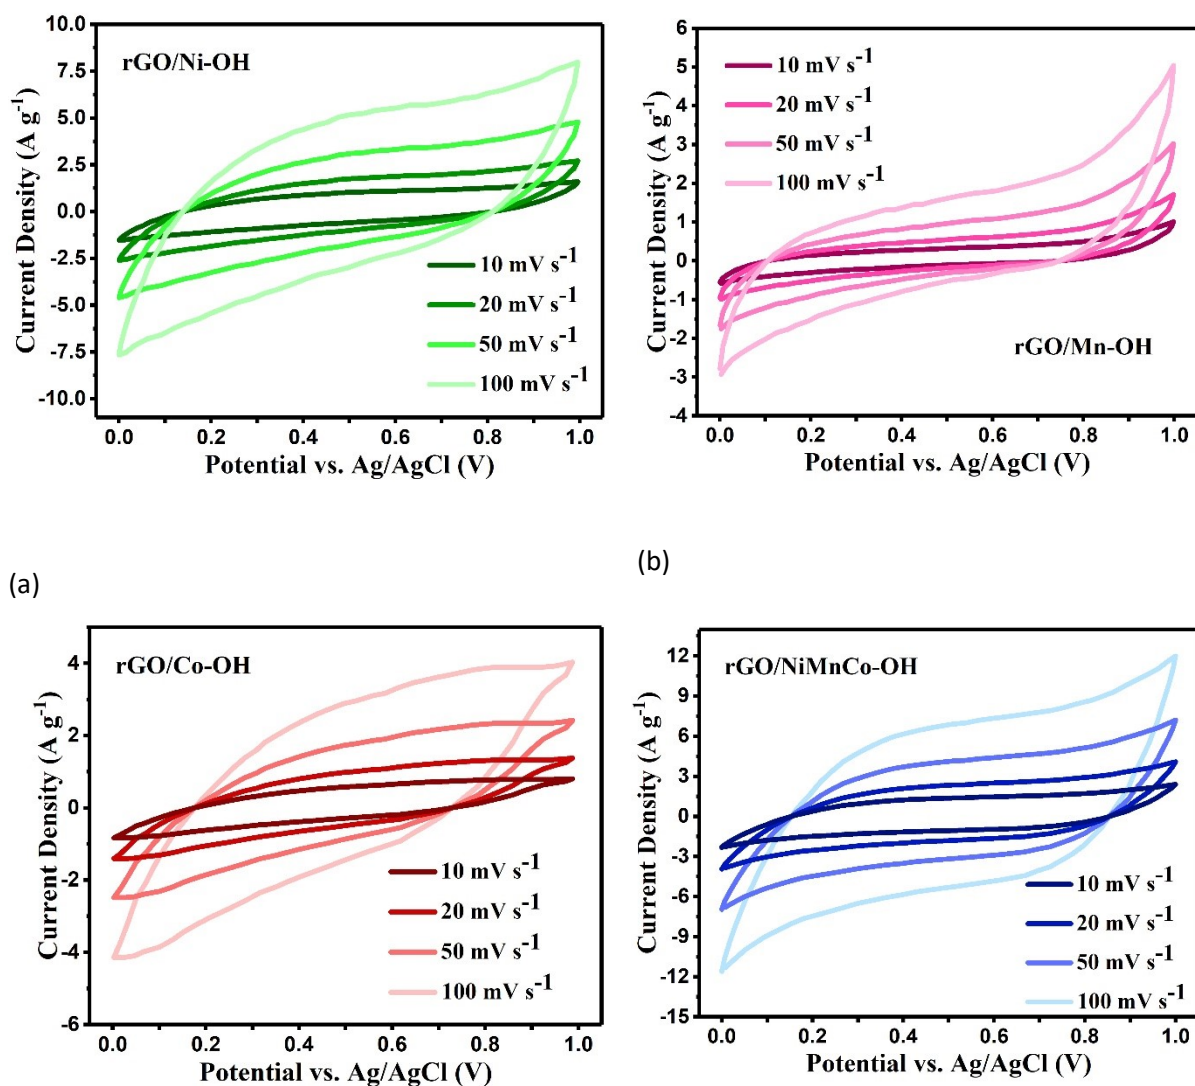

(a)

(b)

(c)

(d)

**Fig. S6.** CV curves of (a) rGO/Ni-OH, (b) rGO/Mn-OH, and (c) rGO/Co-OH, and (d) rGO/NiMnCo-OH nanosheet electrodes at different scan rates in multi-ions water solution with concentration of 400 mg L<sup>-1</sup>.

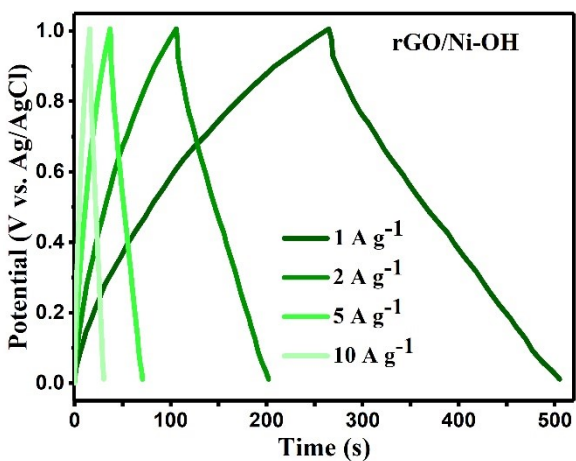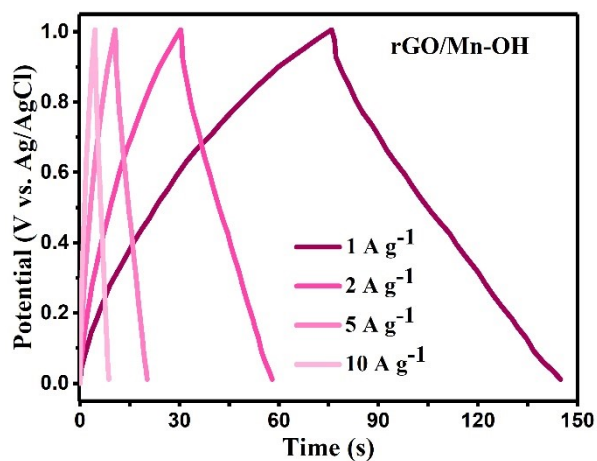

(a)

(b)

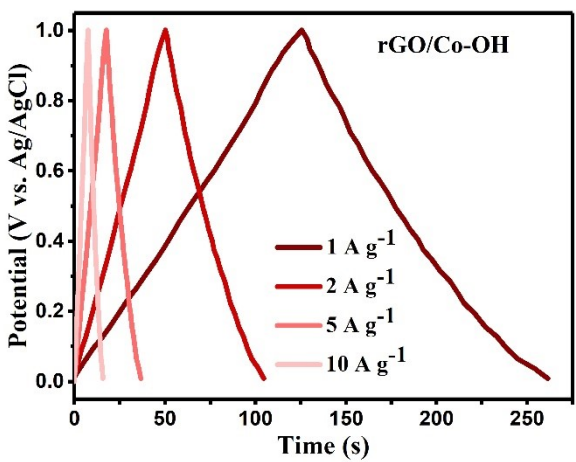

(c)

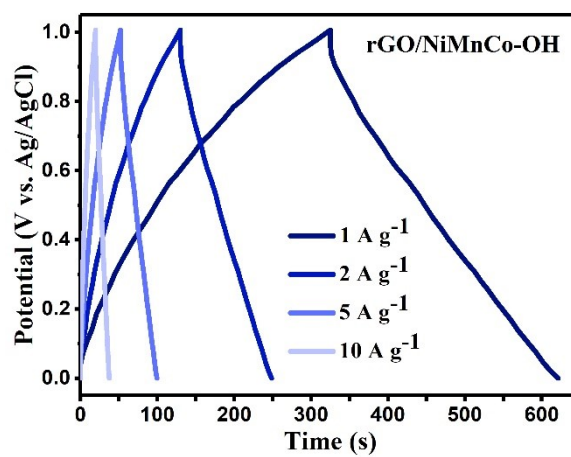

S7(d)

**Fig. S7.** GCD curves of (a) rGO/Ni-OH, (b) rGO/Mn-OH, and (c) rGO/Co-OH, and (d) rGO/NiMnCo-OH nanosheet electrodes at different current densities in multi-ions water solution with concentration of 400 mg L<sup>-1</sup>.

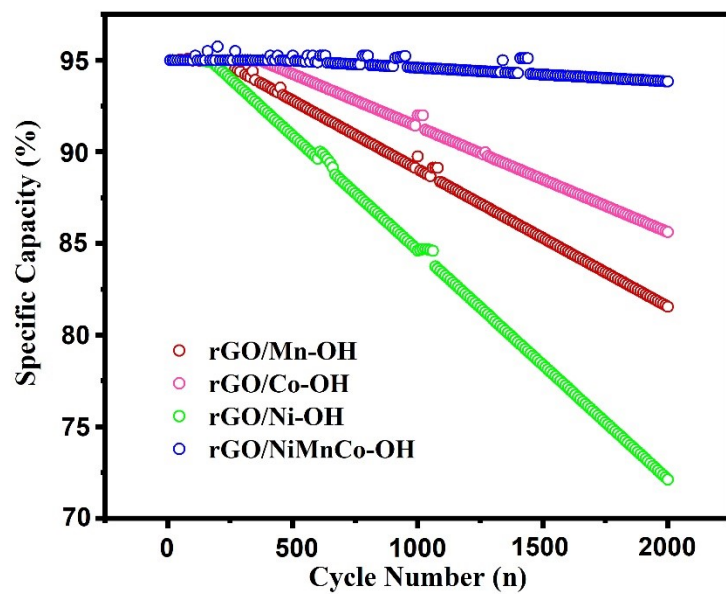

**Fig. S8** specific capacities of electrode materials calculated by GCD plots at 1 A g<sup>-1</sup>



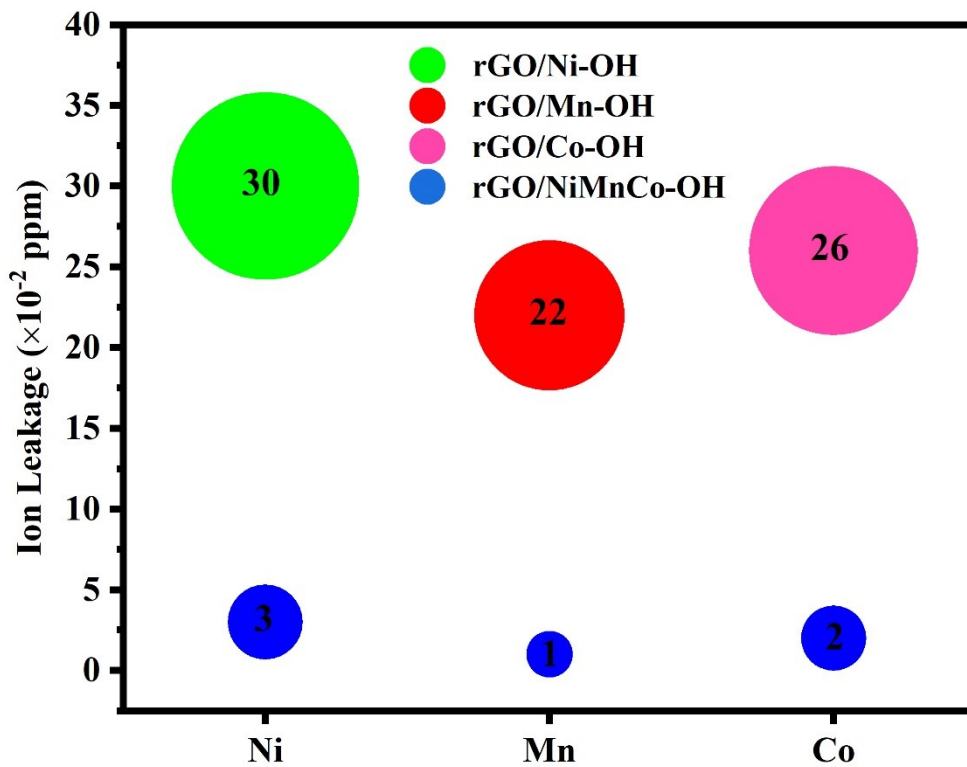

**Fig. S9** concentration of the Ni, Mn, and Co ions in the treated multi-ions water (after 100 desalination-regeneration cycles) for all the CDI nanosheet electrodes

**Table S1** Different CDI solutions (CDI test 1- CDI test 4)

| <b>C-ratio</b>                 | <b>CDI test 1</b> | <b>CDI test 2</b> | <b>CDI test 3</b> | <b>CDI test 4</b> |
|--------------------------------|-------------------|-------------------|-------------------|-------------------|
| $C_{eq,K^+}/C_{eq,Na^+}$       | 0.998             | 0.692             | 0.5               | 0.273             |
| $C_{eq,Mg^{2+}}/C_{eq,Na^+}$   | 0.987             | 0.692             | 0.5               | 0.273             |
| $C_{eq,Ca^{2+}}/C_{eq,Na^+}$   | 0.978             | 0.692             | 0.5               | 0.273             |
| $C_{ads,K^+}/C_{ads,Na^+}$     | 1.109             | 0.747             | 0.555             | 0.301             |
| $C_{ads,Mg^{2+}}/C_{ads,Na^+}$ | 1.1807            | 0.815             | 0.595             | 0.323             |
| $C_{ads,Ca^{2+}}/C_{ads,Na^+}$ | 1.254             | 0.876             | 0.636             | 0.344             |
